# Supplementary material
Source: PubMed Central journal article supplement (PMC188344)

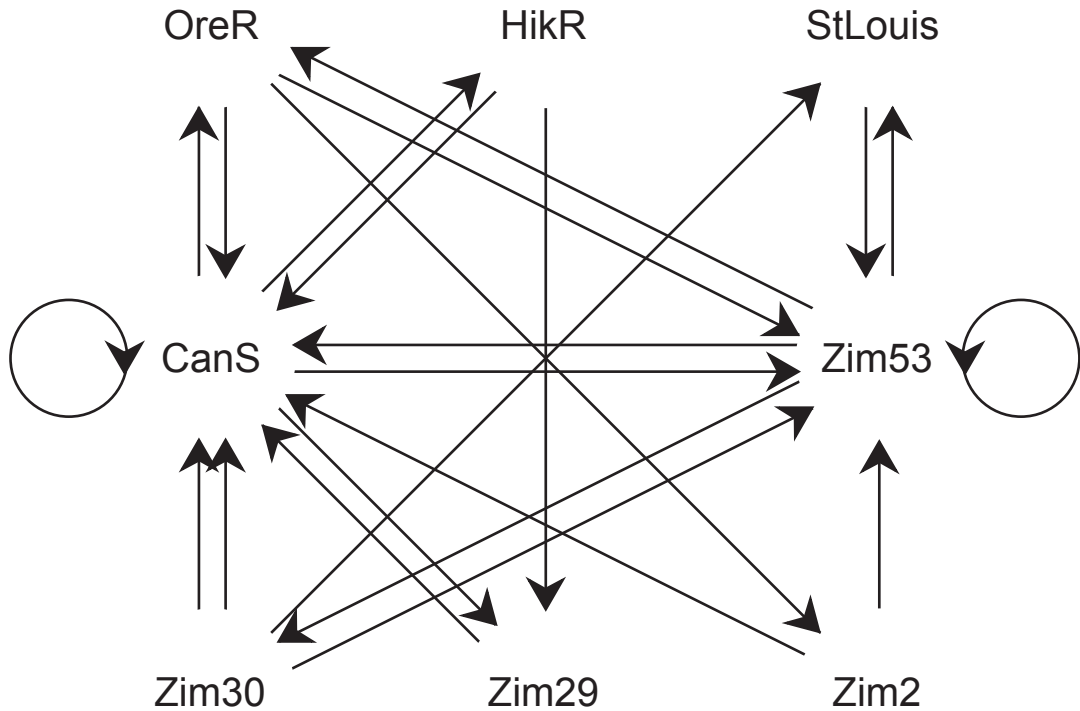

Supplement: pnas_100_17_9894__2.pdf [file pnas_100_17_9894__2.pdf]
